# Supplementary material for: Functional analysis of Samd11, a retinal photoreceptor PRC1 component, in establishing rod photoreceptor identity
Source: PubMed Central journal article supplement (PMC7892874; doi:10.1038/s41598-021-83781-1), 2021-02-18
Supplement: 41598_2021_83781_MOESM1_ESM.pdf [file 41598_2021_83781_MOESM1_ESM.pdf]

## **Supplementary Information**

### **Functional analysis of Samd11, a retinal photoreceptor PRC1 component, in establishing rod photoreceptor identity**

Shun Kubo<sup>1</sup>, Haruka Yamamoto<sup>1</sup>, Naoko Kajimura<sup>2</sup>, Yoshihiro Omori<sup>1</sup>, Yamato Maeda<sup>1</sup>, Taro Chaya<sup>1</sup>, Takahisa Furukawa<sup>1\*</sup>

<sup>1</sup>Laboratory for Molecular and Developmental Biology, Institute for Protein Research, Osaka University, Osaka, 565-0871, Japan

<sup>2</sup>Research Center for Ultrahigh Voltage Electron Microscopy, Osaka University, Osaka, 567-0047, Japan

\*Corresponding author: Takahisa Furukawa

E-mail: [takahisa.furukawa@protein.osaka-u.ac.jp](mailto:takahisa.furukawa@protein.osaka-u.ac.jp)

Laboratory for Molecular and Developmental Biology, Institute for Protein Research, Osaka

University, 3-2 Yamadaoka, Suita, Osaka, 565-0871, Japan

Phone: +81-6-6879-8631

Fax: +81-6-6879-8633

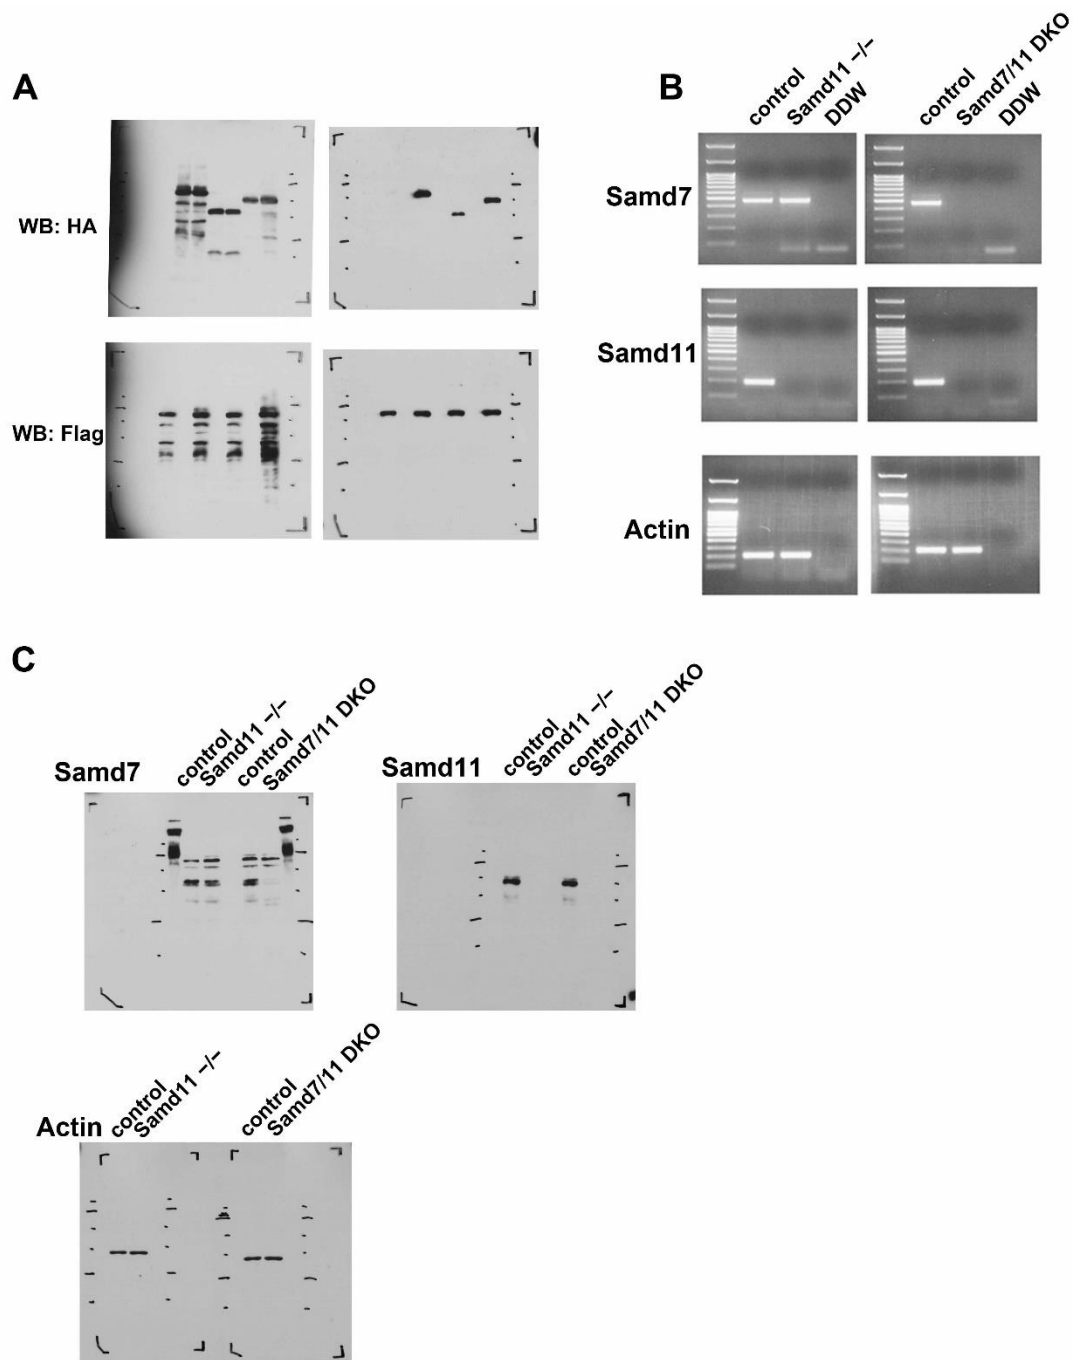

**Figure S1. Full images of immunoprecipitation, RT-PCR, and Western blot analyses.**

**A**, Full images of the immunoprecipitation analysis of Samd11/Samd11, Samd11/Phc2, and Samd11/Samd7.

**B**, Full images of the RT-PCR analysis of Samd7 and Samd11 transcription using intron-spanning primer sets in *Samd11*<sup>-/-</sup> and *Samd7/11* DKO retinas at P12.

**C**, Full images of the Western blot analysis of Samd7, Samd11, and Actin proteins in control, *Samd11*<sup>-/-</sup>, and *Samd7/11* DKO retinas at P12.

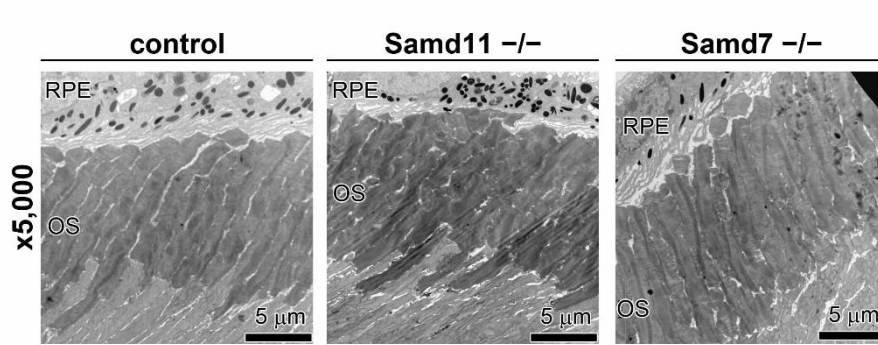

**Figure S2. TEM analysis of photoreceptor outer segments.**

TEM images of the outer segments in the control, *Samd11*<sup>-/-</sup>, and *Samd7*<sup>-/-</sup> retina at the adult stage.

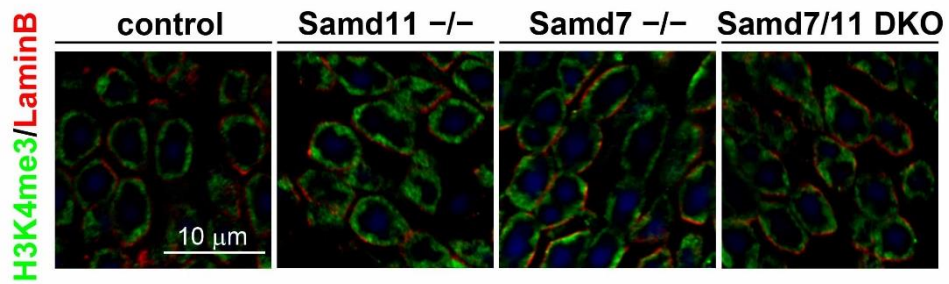

**Figure S3. Immunostaining of H3K4me3 and Lamin B in the control, *Samd11*<sup>-/-</sup>, *Samd7*<sup>-/-</sup>, and *Samd7/11* DKO photoreceptor cells at the adult stage.**

Retinal sections from control, *Samd11*<sup>-/-</sup>, *Samd7*<sup>-/-</sup>, and *Samd7/11* DKO mice were immunostained with anti-H3K4me3 (a marker for euchromatin) and anti-Lamin B (a marker for the nuclear membrane) antibodies.
